# Supplementary material
Source: Elsevier journal article supplement (https://www.sciencedirect.com/science/article/pii/S0213911116300474)
Supplement: mmc1 [file S0213911116300474:mmc1.docx]

**Apéndice. Material *online***

Se puede acceder a los programas formativos de las 21 especialidades incluidas en el TCM a través de la página *web* del Ministerio de Sanidad, Servicios Sociales e Igualdad: http://www.msssi.gob.es/profesionales/formacion/guiaFormacion.htm.

Todos están publicados en el Boletín Oficial del Estado, a excepción del de anestesiología y reanimación, y el de medicina intensiva, que están elaborados por la Comisión de la propia especialidad y aprobados por la Secretaría de Estado de Universidades e Investigación del Ministerio de Educación y Ciencia por Resolución de fecha 25 de abril de 1996. A continuación se enumeran esas 21 especialidades con sus respectivas referencias:

1. Alergología (Orden SCO/3081/2006, de 20 de septiembre).

2. Anestesiología y reanimación.

3. Aparato digestivo (Orden SAS/2854/2009, de 9 de octubre).

4. Cardiología (Orden SCO/1259/2007, de 13 de abril).

5. Endocrinología y nutrición (Orden SCO/3122/2006, de 20 de septiembre).

6. Farmacología clínica (Orden SCO/3129/2006, de 20 de septiembre).

7. Geriatría (Orden SCO/2603/2008, de 1 de septiembre).

8. Hematología y hemoterapia (Orden SCO/3254/2006, de 2 de octubre).

9. Medicina del trabajo (Orden SCO/1526/2005, de 5 de mayo).

10. Medicina familiar y comunitaria (Orden SCO/1198/2005, de 3 de marzo).

11. Medicina física y rehabilitación (Orden SCO/846/2008, de 14 de marzo).

12. Medicina intensiva.

13. Medicina interna (Orden SCO/227/2007, de 24 de enero).

14. Medicina preventiva y salud pública (Orden SCO/1980/2005, de 6 de junio).

15. Nefrología (Orden SCO/2604/2008, de 1 de septiembre).

16. Neumología (Orden SCO/2605/2008, de 1 de septiembre).

17. Neurofisiología clínica (Orden SCO/2617/2008, de 1 de septiembre).

18. Neurología (Orden SCO/528/2007, de 20 de febrero).

19. Oncología médica (Orden SSI/577/2013, de 5 de abril).

20. Oncología radioterápica (Orden SCO/3142/2006, de 20 de septiembre).

21. Reumatología (Orden SAS/2855/2009, de 9 de octubre).
